# Supplementary material for: Positional effects of phosphoserine on β-hairpin stability
Source: Royal Society of Chemistry journal article supplement (doi:10.1039/c0ob00202j), 2010-01-01

# Positional Effects of Phosphoserine on $\beta$ -Hairpin Stability

Alexander J. Riemen, and Marcey L. Waters\*

Department of Chemistry, CB 3290, University of North Carolina, Chapel Hill, NC 27599

Page S1-S10: NMR chemical shift assignments for all peptides

Page S10-S12: Cross-strand NOEs for **WTTS**, **WTTpS**, **SWLW**, **pSWLW**, **WSWL**, **WpSWL**, **WSWS** and **WSWpS****Table S1.** NMR assignments for **WTTS** in pD 7 buffer at 298.15K.

| <b>WTTS</b> | $\alpha$  | $\beta$   | $\gamma$                                    | $\delta$ | $\epsilon$ |
|-------------|-----------|-----------|---------------------------------------------|----------|------------|
| R           | 4.17      | 1.51      | 1.38                                        | 3.05     |            |
| W           | 4.91      | 3.14      | H2 7.20, H4 7.56, H5 7.15, H6 7.22, H7 7.48 |          |            |
| V           | 4.29      | 1.98      | 0.87                                        |          |            |
| T           | 4.65      | 4.08      | 1.12                                        |          |            |
| V           | 4.16      | 2.02      | 0.93                                        |          |            |
| N           | 4.61      | 2.93,2.75 |                                             |          |            |
| G           | 4.01,3.80 |           |                                             |          |            |
| K           | 4.53      | 1.8       | 1.42                                        | 1.75     | 2.99       |
| T           | 4.55      | 4.1       | 1.15                                        |          |            |
| I           | 4.35      | 1.89      | 1.18                                        | 0.9      |            |
| S           | 4.43      | 3.7       |                                             |          |            |
| Q           | 4.32      | 1.92      | 2.3                                         |          |            |

**Table S2.** NMR assignments for **WTTpS** in pD 7 buffer at 298.15K.

| <b>WTTpS</b> | $\alpha$   | $\beta$   | $\gamma$                                    | $\delta$ | $\epsilon$ |
|--------------|------------|-----------|---------------------------------------------|----------|------------|
| R            | 4.13       | 1.53      | 1.32                                        | 3.01     |            |
| W            | 4.92       | 3.19      | H2 7.18, H4 7.61, H5 7.14, H6 7.22, H7 7.47 |          |            |
| V            | 4.23       | 1.99      | 0.87                                        |          |            |
| T            | 4.54       | 4.13      | 1.16                                        |          |            |
| V            | 4.13       | 2.06      | 0.94                                        |          |            |
| N            | 4.65       | 2.85,2.77 |                                             |          |            |
| G            | 3.97, 3.82 |           |                                             |          |            |
| K            | 4.52       | 1.78      | 1.42                                        | 1.68     | 2.99       |
| T            | 4.52       | 4.23      | 1.16                                        |          |            |
| I            | 4.21       | 1.87      | 1.46                                        | 0.92     |            |
| S-PO3        | 4.46       | 4.02      |                                             |          |            |
| Q            | 4.27       | 1.96      | 2.37                                        |          |            |

**Table S3.** NMR assignments for **Cyclic WTTS** in pD 7 buffer at 298.15K.

| <b>Cyclic WTTS</b> | $\alpha$  | $\beta$   | $\gamma$                              | $\delta$ | $\epsilon$ |
|--------------------|-----------|-----------|---------------------------------------|----------|------------|
| C                  | 4.5       | 3.02,2.78 |                                       |          |            |
| R                  | 4.59      | 1.81      | 1.59                                  | 3.18     |            |
| W                  | 5.22      | 3.06      | H5 7.06, H2/H6 7.24, H7 7.38, H4 7.46 |          |            |
| V                  | 4.62      | 2.05      | 0.88                                  |          |            |
| T                  | 5.16      | 3.92      | 1.02                                  |          |            |
| V                  | 4.24      | 1.91      | 0.91                                  |          |            |
| N                  | 4.41      | 3.08,2.77 |                                       |          |            |
| G                  | 4.13,3.56 |           |                                       |          |            |
| K                  | 4.73      | 1.85      | 1.43                                  | 1.71     | 3.04       |
| T                  | 4.97      | 3.96      | 1.16                                  |          |            |
| I                  | 4.75      | 1.9       | 1.16                                  | 0.91     |            |
| S                  | 4.3       | 3.25,2.89 |                                       |          |            |
| Q                  | 4.53      | 1.84      | 2.07,2.22                             |          |            |
| C                  | 4.73      | 3.23,2.89 |                                       |          |            |

**Table S4.** NMR assignments for **RWVTVNG** in pD 7 buffer at 298.15K.

| <b>RWVTVNG</b> | $\alpha$ | $\beta$   | $\gamma$                                    | $\delta$ | $\epsilon$ |
|----------------|----------|-----------|---------------------------------------------|----------|------------|
| R              | 4.13     | 1.55      | 1.37                                        | 3.05     |            |
| W              | 4.76     | 3.34,3.22 | H2 7.21, H4 7.62, H5 7.08, H6 7.22, H7 7.44 |          |            |
| V              | 4.12     | 2         | 0.87                                        |          |            |
| T              | 4.34     | 4.16      | 1.19                                        |          |            |
| V              | 4.13     | 2.1       | 0.93                                        |          |            |
| N              | 4.69     | 2.86,2.75 |                                             |          |            |
| G              | 3.88     |           |                                             |          |            |

**Table S5.** NMR assignments for **NGKTIpSQ** in pD 7 buffer at 298.15K.

| <b>NGKTIpSQ</b> | $\alpha$ | $\beta$ | $\gamma$  | $\delta$ | $\epsilon$ |
|-----------------|----------|---------|-----------|----------|------------|
| N               | 4.69     | 2.82    |           |          |            |
| G               | 3.94     |         |           |          |            |
| K               | 4.45     | 1.86    | 1.43      | 1.75     | 3          |
| T               | 4.39     | 4.31    | 1.21      |          |            |
| I               | 4.14     | 1.91    | 1.51,1.24 | 0.94     |            |
| S-PO3           | 4.55     | 4.14    |           |          |            |
| Q               | 4.31     | 1.99    | 2.39      |          |            |

**Table S6.** NMR assignments for **NGKTISQ** in pD 7 buffer at 298.15K.

| <b>NGKTISQ</b> | $\alpha$ | $\beta$ | $\gamma$ | $\delta$ | $\epsilon$ |
|----------------|----------|---------|----------|----------|------------|
| N              | 4.68     | 2.82    |          |          |            |
| G              | 3.95     |         |          |          |            |
| K              | 4.38     | 1.82    | 1.42     | 1.78     |            |
| T              | 4.35     | 4.18    | 1.2      |          |            |
| I              | 4.21     | 1.88    | 1.47     | 0.92     |            |
| S              | 4.46     | 3.86    |          |          |            |
| Q              | 4.34     | 1.99    | 2.38     |          |            |

**Table S7.** NMR assignments for **SWLW** in pD 7 buffer at 298.15K.

| <b>SWLW</b> | $\alpha$  | $\beta$   | $\gamma$                                    | $\delta$  | $\epsilon$ |
|-------------|-----------|-----------|---------------------------------------------|-----------|------------|
| R           | 4.33      | 1.72      | 1.51                                        | 3.11      |            |
| S           | 4.86      | 3.26,4.34 |                                             |           |            |
| V           | 4.21      | 1.9       | 0.87                                        |           |            |
| W           | 4.94      | 3         | H2/H6 7.20, H4 7.62, H5 7.05, H7 7.41       |           |            |
| V           | 4.34      | 1.92      | 0.79                                        |           |            |
| N           | 4.39      | 3.05/2.72 |                                             |           |            |
| G           | 4.14,3.69 |           |                                             |           |            |
| K           | 4.61      | 1.73      | 1.37                                        | 1.71      | 3          |
| L           | 3.95      | 1.19      | 0.76                                        | 0.35,0.12 |            |
| I           | 4.36      | 1.87      | 1.18                                        | 0.81      |            |
| W           | 4.75      | 3.11      | H2 7.20, H4 7.51, H5 7.15, H6 7.25, H7 7.51 |           |            |
| Q           | 4.28      | 1.73/1.93 | 2.12                                        |           |            |

**Table S8.** NMR assignments for **pSWLW** in pD 7 buffer at 298.15K.

| <b>pSWLW</b> | $\alpha$  | $\beta$   | $\gamma$                                    | $\delta$ | $\epsilon$ |
|--------------|-----------|-----------|---------------------------------------------|----------|------------|
| R            | 4.35      | 1.83      | 1.69                                        | 3.2      |            |
| S-PO3        | 4.5       | 4.12,3.97 |                                             |          |            |
| V            | 4.26      | 1.98      | 0.9                                         |          |            |
| W            | 5         | 3.01      | H2 7.19, H4 7.43, H5 7.05, H6 7.19, H7 7.56 |          |            |
| V            | 4.11      | 2.09      | 0.83                                        |          |            |
| N            | 4.46      | 3.03,2.73 |                                             |          |            |
| G            | 4.12/3.78 |           |                                             |          |            |
| K            | 4.58      | 1.75      | 1.37                                        | 1.71     | 2.96       |
| L            | 4.05      | 1.21      | n/a                                         | 0.73     |            |
| I            | 4.19      | 1.84      | n/a                                         | 0.78     |            |
| W            | 4.66      | 3.24      | H2 7.25, H4 7.48, H5 7.13, H6 7.19, H7 7.61 |          |            |
| Q            | 4.12      | 1.76      | 2.03                                        |          |            |

**Table S9.** NMR assignments for **WSWL** in pD 7 buffer at 298.15K.

| <b>WSWL</b> | $\alpha$  | $\beta$   | $\gamma$                                    | $\delta$     | $\epsilon$ |
|-------------|-----------|-----------|---------------------------------------------|--------------|------------|
| R           | 4.45      | 1.65      | 1.52                                        | 3.15         |            |
| W           | 5.09      | 2.96      | H2 7.14, H4 7.40, H5 7.00, H6 7.18, H7 7.36 |              |            |
| V           | 4.11      | 1.86      | 0.82                                        |              |            |
| S           | 4.44      | 3.16,2.12 |                                             |              |            |
| V           | 4.57      | 1.96      | 0.84                                        |              |            |
| N           | 4.3       | 2.68,3.01 |                                             |              |            |
| G           | 3.99,3.36 |           |                                             |              |            |
| K           | 4.54      | 1.75      | 1.38                                        | 1.69         | 2.99       |
| W           | 5.1       | 3.01      | H2 7.14, H4 7.59, H5 7.00, H6 7.18, H7 7.40 |              |            |
| I           | 4.67      | 1.83      |                                             | 0.83         |            |
| L           | 3.89      | 1.18      | 0.31                                        | 0.19,-0.0029 |            |
| Q           | 4.31      | 1.85      | 2.21,2.00                                   |              |            |

**Table S10.** NMR assignments for **WpSWL** in pD 7 buffer at 298.15K.

| <b>WpSWL</b> | $\alpha$   | $\beta$   | $\gamma$                                    | $\delta$  | $\epsilon$ |
|--------------|------------|-----------|---------------------------------------------|-----------|------------|
| R            | 4.38       | 1.67      | 1.51                                        | 3.12      |            |
| W            | 5.05       | 3.07,3.19 | H2 7.13, H4 7.44, H5 7.06, H6 7.31, H7 7.41 |           |            |
| V            | 4.38       | 1.97      | 0.83                                        |           |            |
| S-PO3        | 4.56       | 3.66,3.38 |                                             |           |            |
| V            | 4.07       | 1.97      | 0.87                                        |           |            |
| N            | 4.47       | 2.93,2.71 |                                             |           |            |
| G            | 3.94, 3.73 |           |                                             |           |            |
| K            | 4.44       | 1.73      | 1.34                                        | 1.69      | 2.94       |
| W            | 4.9        | 3.01      | H2 7.21, H4 7.63, H5 7.16, H6 7.21, H7 7.50 |           |            |
| I            | 4.46       | 1.71      | N/A                                         | 0.85      |            |
| L            | 3.99       | 1.32      | 0.71                                        | 0.55,0.35 |            |
| Q            | 4.28       | 1.88,2.04 | 2.27                                        |           |            |

**Table S11.** NMR assignments for **RSVWVNG** in pD 7 buffer at 298.15K.

| <b>RSVWVNG</b> | $\alpha$ | $\beta$ | $\gamma$                                    | $\delta$ | $\epsilon$ |
|----------------|----------|---------|---------------------------------------------|----------|------------|
| R              | 4.27     | 1.69    | 1.56                                        | 3.13     |            |
| S              | 4.52     | 3.75    |                                             |          |            |
| V              | 4.08     | 1.97    | 0.79                                        |          |            |
| W              | 4.68     | 3.17    | H2 7.20, H4 7.63, H5 7.15, H6 7.23, H7 7.47 |          |            |
| V              | 3.99     | 1.93    | 0.82                                        |          |            |
| N              | 4.51     | 2.66    |                                             |          |            |
| G              | 3.87     |         |                                             |          |            |

**Table S12.** NMR assignments for **RSpVWVNG** in pD 7 buffer at 298.15K.

| <b>RSpVWVNG</b> | $\alpha$ | $\beta$ | $\gamma$                                    | $\delta$ | $\epsilon$ |
|-----------------|----------|---------|---------------------------------------------|----------|------------|
| R               | 4.21     | 1.72    | 1.61                                        | 3.09     |            |
| S-PO3           | 4.42     | 4.05    |                                             |          |            |
| V               | 4.04     | 1.98    | 0.78                                        |          |            |
| W               | 4.61     | 3.18    | H2 7.21, H4 7.64, H5 7.17, H6 7.21, H7 7.49 |          |            |
| V               | 3.92     | 1.87    | 0.77                                        |          |            |
| N               | 4.44     | 2.67    |                                             |          |            |
| G               | 3.82     |         |                                             |          |            |

**Table S13.** NMR assignments for **NGKLIWQ** in pD 7 buffer at 298.15K.

| <b>NGKLIWQ</b> | $\alpha$ | $\beta$  | $\gamma$                              | $\delta$ | $\epsilon$ |
|----------------|----------|----------|---------------------------------------|----------|------------|
| N              | 4.52     | 2.76,2.8 |                                       |          |            |
| G              | 3.9      |          |                                       |          |            |
| K              | 4.26     |          | 1.36                                  | 1.67     | 2.92       |
| L              | 4.3      | 1.54     | 1.45                                  | 0.86     |            |
| I              | 4.09     | 1.78     | 1.37,1.12                             | 0.8      |            |
| W              | 4.64     | 3.28     | H2/H6 7.23, H4 7.61, H5 7.15, H7 7.47 |          |            |
| Q              | 4.12     | 1.76     | 2.02                                  |          |            |

**Table S14.** NMR assignments for **RWVSVNG** in pD 7 buffer at 298.15K.

| <b>RWVSVNG</b> | $\alpha$ | $\beta$ | $\gamma$                              | $\delta$ | $\epsilon$ |
|----------------|----------|---------|---------------------------------------|----------|------------|
| R              | 4.11     | 1.53    | 1.36                                  | 3.02     |            |
| W              | 4.68     | 3.18    | H5 7.13, H2/H6 7.19, H7 7.45, H4 7.58 |          |            |
| V              | 4        | 1.92    | 0.81                                  |          |            |
| S              | 4.33     | 3.78    |                                       |          |            |
| V              | 4.1      | 2.07    | 0.88                                  |          |            |
| N              | 4.64     | 2.71    |                                       |          |            |
| G              | 3.83     |         |                                       |          |            |

**Table S15.** NMR assignments for **RWVSpVNG** in pD 7 buffer at 298.15K.

| <b>RWVSpVNG</b> | $\alpha$ | $\beta$   | $\gamma$ | $\delta$                     | $\epsilon$ |
|-----------------|----------|-----------|----------|------------------------------|------------|
| R               | 4.21     | 1.63      | 1.45     | 3.1                          |            |
| W               | 4.69     | 3.25      |          | H5 7.18, H2/6 7.24, H4/7 7.6 |            |
| V               | 4.04     | 1.93      | 0.85     |                              |            |
| S-PO3           | 4.42     | 4.12      |          |                              |            |
| V               | 4.1      | 2.09      | 0.94     |                              |            |
| N               | 4.71     | 2.88.2.78 |          |                              |            |
| G               | 3.88     |           |          |                              |            |

**Table S16.** NMR assignments for **SWLV** in pD 4 buffer at 298.15K.

| <b>SWLV</b> | $\alpha$   | $\beta$   | $\gamma$                                | $\delta$ | $\epsilon$ |
|-------------|------------|-----------|-----------------------------------------|----------|------------|
| R           | 4.38       | 1.65      | 1.77                                    | 3.19     |            |
| S           | 4.85       | 3.65      |                                         |          |            |
| V           | 4.35       | 1.96      |                                         |          |            |
| W           | 5          | 3.06      | H2 7.14 H4 7.45 H5 7.03 H6 7.16 H7 7.45 |          |            |
| V           | 4.16       | 0.83      | 1.86                                    |          |            |
| N           | 4.44       | 2.74,3.08 |                                         |          |            |
| G           | 4.09, 3.66 |           |                                         |          |            |
| K           | 4.63       | 1.77      | 1.42                                    | 1.74     | 3.03       |
| L           | 3.87       | 1.19      | 0.37                                    | 0.12     |            |
| I           | 4.23       | 1.81      |                                         | 0.83     |            |
| V           | 4.16       | 0.83      | 1.86                                    |          |            |
| Q           | 4.38       | 1.96      | 2.31                                    |          |            |

**Table S17.** NMR assignments for **pSWLV** in pD 4 buffer at 298.15K.

| <b>pSWLV</b> | $\alpha$   | $\beta$   | $\gamma$                                | $\delta$  | $\epsilon$ |
|--------------|------------|-----------|-----------------------------------------|-----------|------------|
| R            | 4.36       | 1.8       | 1.69                                    | 3.21      |            |
| S-PO3        | 4.7        | 4.02      |                                         |           |            |
| V            | 4.29       | 1.97      | 0.87                                    |           |            |
| W            | 4.99       | 3.06      | H2 7.13 H4 7.46 H5 7.05 H6 7.18 H7 7.47 |           |            |
| V            | 4.14       | 1.99      | 0.87                                    |           |            |
| N            | 4.45       | 3.65,2.73 |                                         |           |            |
| G            | 4.13, 3.77 |           |                                         |           |            |
| K            | 4.59       | 1.77      | 1.39                                    | 1.72      | 2.99       |
| L            | 3.81       | 1.25      | 0.96                                    | 0.52,0.31 |            |
| I            | 4.21       | 1.86      | 1.28                                    | 0.83      |            |
| V            | 4.21       | 1.88      | 0.89                                    |           |            |
| Q            | 4.29       | 1.97      | 2.32                                    |           |            |

**Table S18.** NMR assignments for **NGKWILQ** in pD 7 buffer at 298.15K.

| <b>NGKWILQ</b> | $\alpha$ | $\beta$ | $\gamma$                              | $\delta$ | $\epsilon$ |
|----------------|----------|---------|---------------------------------------|----------|------------|
| N              | 4.64     |         |                                       |          |            |
| G              | 3.83     |         |                                       |          |            |
| K              | 4.21     |         | 1.2                                   | 1.69     | 2.87       |
| W              | 4.7      | 3.24    | H5 7.18, H2/H6 7.22, H4 7.69, H7 7.49 |          |            |
| I              | 4.06     | 1.73    |                                       | 0.8      |            |
| L              | 4.25     | 1.58    | 0.93                                  | 0.9      |            |
| Q              | 4.26     | 1.96    | 2.34                                  |          |            |

**Table S19.** NMR assignments for **Cyclic SWLW** in pD 7 buffer at 298.15K.

| <b>Cyclic SWLW</b> | $\alpha$  | $\beta$   | $\gamma$ | $\delta$                                    | $\epsilon$ |
|--------------------|-----------|-----------|----------|---------------------------------------------|------------|
| C                  | 4.88      | 3.21,2.87 |          |                                             |            |
| R                  | 4.56      | 1.79      | 1.51     | 3.13                                        |            |
| S                  | 4.7       |           |          |                                             |            |
| V                  | 4.22      | 1.88      | 0.86     |                                             |            |
| W                  | 4.94      | 3.02      |          | H2 7.16, H4 7.44, H5 6.99, H6 7.16, H7 7.40 |            |
| V                  | 4.35      | 1.9       | 0.78     |                                             |            |
| N                  | 4.36      | 3.06,2.07 |          |                                             |            |
| G                  | 4.15,3.66 |           |          |                                             |            |
| K                  | 4.61      | 1.7       | 1.36     |                                             | 2.99       |
| L                  | 3.92      | 1.13      | 0.61     | 0.32,0.19                                   |            |
| I                  | 4.43      | 1.86      | 1.14     | 0.81                                        |            |
| W                  | 4.8       |           |          | H2 7.16, H4 7.44, H5 6.99, H6 7.09, H7 7.31 |            |
| Q                  | 4.53      | 1.84      | 2.13     |                                             |            |
| C                  | 5.09      | 2.96,2.18 |          |                                             |            |

**Table S20.** NMR assignments for **Cyclic WSWL** in pD 7 buffer at 298.15K.

| <b>Cyclic WSWL</b> | $\alpha$  | $\beta$   | $\gamma$ | $\delta$                                    | $\epsilon$ |
|--------------------|-----------|-----------|----------|---------------------------------------------|------------|
| C                  | 4.75      | n/a       |          |                                             |            |
| R                  | 4.68      | 1.85      | 1.66     | 3.18                                        |            |
| W                  | 5.16      | n/a       |          | H2 7.23, H4 7.50, H6 7.17, H5 6.99, H7 7.47 |            |
| V                  | 4.12      | 1.9       | 0.85     |                                             |            |
| S                  | 4.46      | 3.06,1.99 |          |                                             |            |
| V                  | 4.65      | 1.96      | 0.86     |                                             |            |
| N                  | 4.31      | 3.01,2.71 |          |                                             |            |
| G                  | 4.03,3.35 |           |          |                                             |            |
| K                  | 4.59      | 1.72      | 1.41     |                                             | 3.02       |
| W                  | 5.16      | n/a       |          | H2 7.23, H4 7.43, H5 7.03, H6 7.21, H7 7.38 |            |
| I                  | 4.71      | 1.89      |          | 0.88                                        |            |
| L                  | 3.88      | 1.27      | 0.37     | -0.27,0.89                                  |            |
| Q                  | 4.55      | 1.86      | 2.17     |                                             |            |
| C                  | 4.76      | n/a       |          |                                             |            |

**Table S21.** NMR assignments for **WSWS** in pD 7 buffer at 298.15K.

| <b>WSWS</b> | $\alpha$  | $\beta$   | $\gamma$                                    | $\delta$ | $\epsilon$ |
|-------------|-----------|-----------|---------------------------------------------|----------|------------|
| R           | 4.31      | 1.65      | 1.47                                        | 3.11     |            |
| W           | 4.96      | 3.06      | H2 7.19, H4 7.45, H5 7.05, H6 7.19, H7 7.40 |          |            |
| V           | 4.44      | 1.97      | 0.86                                        |          |            |
| S           | 4.51      | 3.35,2.79 |                                             |          |            |
| V           | 4.14      | 1.95      | 0.89                                        |          |            |
| N           | 4.46      | 2.96,2.73 |                                             |          |            |
| G           | 3.98,3.46 |           |                                             |          |            |
| K           | 4.48      | 1.69      | 1.36                                        |          | 2.98       |
| W           | 5.04      | 3.04,3.19 | H2 7.14, H4 7.40, H5 7.05, H6 7.19, H7 7.36 |          |            |
| I           | 4.51      | 1.86      | 1.18                                        | 0.89     |            |
| S           | 4.24      | 3.42,3.22 |                                             |          |            |
| Q           | 4.31      | 1.87      | 2.26,2.09                                   |          |            |

**Table S22.** NMR assignments for **WpSWS** in pD 7 buffer at 298.15K.

| <b>WpSWS</b> | $\alpha$ | $\beta$   | $\gamma$                                | $\delta$ | $\epsilon$ |
|--------------|----------|-----------|-----------------------------------------|----------|------------|
| R            | 4.23     | 1.63      | 1.44                                    | 3.05     |            |
| W            | 4.79     | 3.15      | H2 7.18 H4 7.49 H5 7.13 H6 7.25 H7 7.49 |          |            |
| V            | 4.12     | 1.95      | 0.84                                    |          |            |
| S-PO3        | 4.48     | 3.96      |                                         |          |            |
| V            | 4.04     | 1.95      | 0.84                                    |          |            |
| N            | 4.64     | 2.74      |                                         |          |            |
| G            | 3.84     |           |                                         |          |            |
| K            | 4.28     | 1.66      | 1.25                                    | 1.64     | 2.9        |
| W            | 4.79     | 3.15      | H2 7.18 H4 7.49 H5 7.18 H6 7.25 H7 7.49 |          |            |
| I            | 4.18     | 1.74      | 1.07                                    | 0.82     |            |
| S            | 4.28     | 3.72      |                                         |          |            |
| Q            | 4.33     | 2.03,2.21 | 2.4                                     |          |            |

**Table S23.** NMR assignments for **WSWpS** in pD 7 buffer at 298.15K.

| <b>WSWpS</b> | $\alpha$   | $\beta$    | $\gamma$                                    | $\delta$ | $\epsilon$ |
|--------------|------------|------------|---------------------------------------------|----------|------------|
| R            | 4.18       | 1.5        | 1.25                                        | 2.93     |            |
| W            | 4.87       | 3.06       | H2 7.12 , H4 7.37 ,H5 7.05, H6,7.19 H7 7.42 |          |            |
| V            | 4.29       | 1.89       | 0.81                                        |          |            |
| S            | 4.46       | 3.52, 3.20 |                                             |          |            |
| V            | 4.11       | 2.03       | 0.93                                        |          |            |
| N            | 4.54       | 2.94,2.75  |                                             |          |            |
| G            | 3.95, 3.60 |            |                                             |          |            |
| K            | 4.43       | 1.74       | 1.33                                        | 1.67     | 2.96       |
| W            | 4.87       | 3.06       | H2 7.12 , H4 7.42 ,H5 7.05, H6,7.16 H7 7.42 |          |            |
| I            | 4.39       | 1.8        | 1.15                                        | 0.88     |            |
| S-PO3        | 4.43       | 3.97       |                                             |          |            |
| Q            | 4.28       | 1.92       | 2.31                                        |          |            |



**Table S24.** NMR assignments for **WpSWpS** in pD 7 buffer at 298.15K.

| <b>WpSWpS</b> | $\alpha$ | $\beta$    | $\gamma$                                    | $\delta$ | $\epsilon$ |
|---------------|----------|------------|---------------------------------------------|----------|------------|
| R             | 4.2      | 1.63       | 1.45                                        | 3.09     |            |
| W             | 4.67     | 3.25       | H2 7.15, H4 7.63, H5 7.15, H6 7.22, H7 7.52 |          |            |
| V             | 4.1      | 2.1        | 0.9                                         |          |            |
| S-PO3         | 4.45     | 4.04       |                                             |          |            |
| V             | 4.05     | 2.06       | 0.9                                         |          |            |
| N             | 4.7      | 2.78       |                                             |          |            |
| G             | 3.88     |            |                                             |          |            |
| K             | 4.29     | 1.66       | 1.31                                        | 1.63     | 2.91       |
| W             | 4.7      | 3.25       | H2 7.15, H4 7.63, H5 7.15, H6 7.22, H7 7.52 |          |            |
| I             | 4.1      | 1.69       | 1.08                                        | 0.81     |            |
| S-PO3         | 4.33     | 4.01, 4.07 |                                             |          |            |
| Q             | 4.25     | 1.94       | 2.35, 2.18                                  |          |            |

**Table S25.** NMR assignments for **NGKWISQ** in pD 7 buffer at 298.15K

| <b>NGKWISQ</b> | $\alpha$ | $\beta$ | $\gamma$                              | $\delta$ | $\epsilon$ |
|----------------|----------|---------|---------------------------------------|----------|------------|
| N              | 4.67     | 2.78    |                                       |          |            |
| G              | 3.83     |         |                                       |          |            |
| K              | 4.24     | 1.62    | 1.24                                  |          | 2.89       |
| W              | 4.68     | 3.24    | H2/H6 7.22, H4 7.61, H5 7.14, H7 7.48 |          |            |
| I              | 4.07     | 1.72    | 1.07                                  | 0.83     |            |
| S              | 4.29     | 3.82    |                                       |          |            |
| Q              | 4.3      | 1.98    | 2.36                                  |          |            |

**Table S26.** NMR assignments for **NGKWIpSQ** in pD 7 buffer at 298.15K.

| <b>NGKWIpSQ</b> | $\alpha$ | $\beta$ | $\gamma$                                    | $\delta$ | $\epsilon$ |
|-----------------|----------|---------|---------------------------------------------|----------|------------|
| N               | 4.67     | 2.78    |                                             |          |            |
| G               | 3.83     |         |                                             |          |            |
| K               | 4.28     | 1.64    | 1.27                                        |          | 2.91       |
| W               | 4.68     | 3.27    | H2 7.17, H4 7.57, H5 7.12, H6 7.20, H7 7.44 |          |            |
| I               | 4.08     | 1.71    | 1.07                                        | 0.83     |            |
| S-PO3           | 4.38     | 4.1     |                                             |          |            |
| Q               | 4.29     | 1.97    | 2.35                                        |          |            |

**Table S27.** NMR assignments for **Cyclic WSWS** in pD 7 buffer at 298.15K.

| cyclic WSWS | $\alpha$  | $\beta$    | $\gamma$                                    | $\delta$ | $\epsilon$ |
|-------------|-----------|------------|---------------------------------------------|----------|------------|
| C           | 4.95      | 2.90,3.08  |                                             |          |            |
| R           | 4.62      | 1.82       | 1.59                                        | 3.14     |            |
| W           | 5.02      | 2.89       | H2 7.22, H4 7.43, H5 7.03, H6 7.22, H7 7.33 |          |            |
| V           | 4.62      | 1.98       | 0.86                                        |          |            |
| S           | 4.65      | 2.88       |                                             |          |            |
| V           | 4.12      | 1.81       | 0.86                                        |          |            |
| N           | 4.29      | 3.07,2.70  |                                             |          |            |
| G           | 4.04,3.36 |            |                                             |          |            |
| K           | 4.57      | 1.85       | 1.4                                         | 1.71     | 3.02       |
| W           | 5.29      | 3.09, 2.97 | H2 7.15, H4 7.33, H5 7.03, H6 7.22, H7 7.28 |          |            |
| I           | 4.73      | 1.9        |                                             | 0.9      |            |
| S           | 4.45      | 3.10,2.07  |                                             |          |            |
| Q           | 4.53      | 1.83       | 2.20,2.05                                   |          |            |
| C           | 5.1       | 3          |                                             |          |            |

**Figure S1. NOES of WTTS**

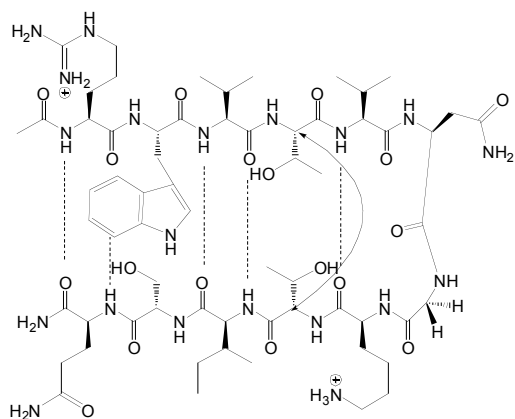

**Figure S2 NOES of SWLW**

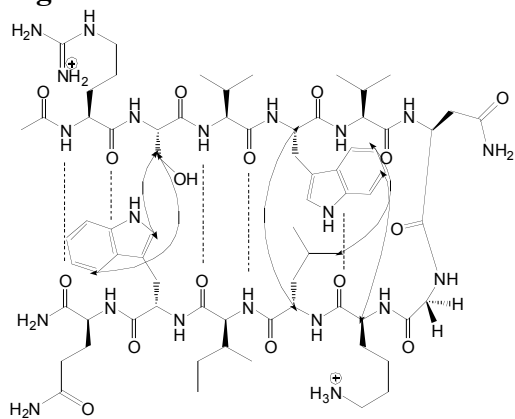

**Figure S3 NOES of pSWLW**

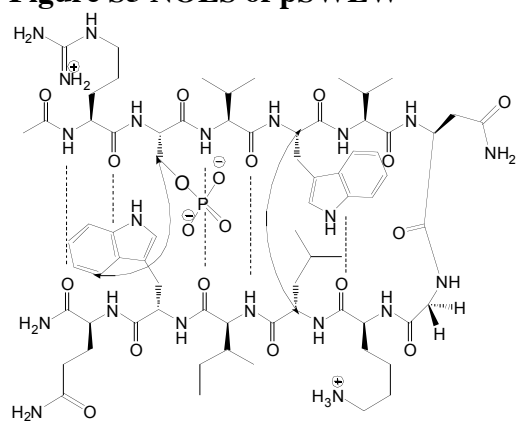

**Figure S4 NOES of WSWL**

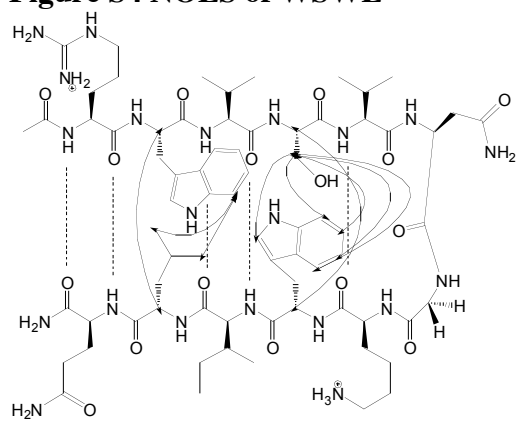

**Figure S5 NOES of WpSWL**

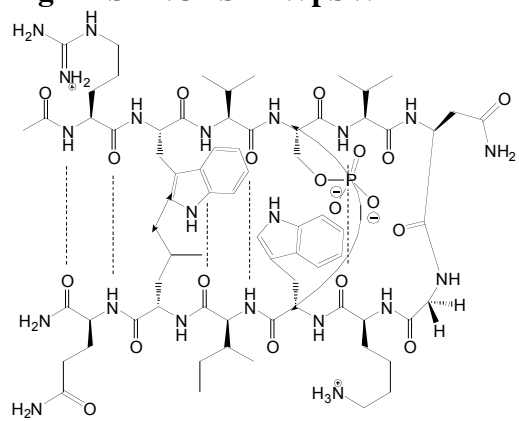

**Figure S6. NOES of WSWs**

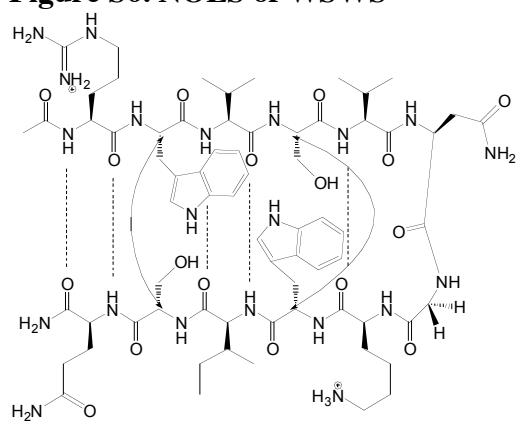

**Figure S7. NOES of WSWpS**

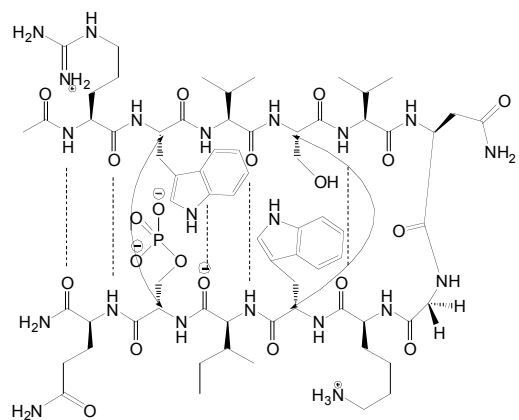

Supplement: c0ob00202j.pdf [file c0ob00202j.pdf]
